# Supplementary material for: Characterization of 22q12 Microdeletions Causing Position Effect in Rare NF2 Patients with Complex Phenotypes
Source: MDPI journal article supplement (doi:10.3390/ijms231710017), 2022-09-02
Supplement: s1 [file s1]

**Table S6. Sequence of primers for PCR assays**

| Oligonucleotide name | Sequence (5' to 3')     |
|----------------------|-------------------------|
| AP1B1_1_FW           | CGGACATTTTGGTGCCAAGC    |
| AP1B1_1_REV          | CTCACAGTCCTTCACAAAGGT   |
| AP1B1_2_FW           | AGATGTCAGTGCCCTCTTCC    |
| AP1B1_2_REV          | GGGTGAGACTCGGCAATTTC    |
| AP1B1_3_FW           | CCAAGCTCCACGACATCAAC    |
| AP1B1_3_REV          | TCTCAGGCCTTTTCTGCACG    |
| AP1B1_4_FW           | CTGCTGTGAAGGTGCTGATG    |
| AP1B1_4_REV          | ACACTCTCATACTTGTGTTGGGG |
| AP1B1_5_FW           | CGCAACAGAAGTGATGTGG     |
| AP1B1_5_REV          | TATCTGAGTCCTGAGTGGCC    |
| AP1B1_6.1_FW         | GCTTCCATGACGAGAGCACA    |
| AP1B1_6.2_FW         | CCCACACTGTTAGACGAGCT    |
| AP1B1_6.1_REV        | CATCCCCCATCAGGCTGTC     |
| AP1B1_6.2_REV        | GTTGGTGCCCCCAATCAGG     |
| AP1B1_7.1_FW         | CAGCCTGATGGGGGATGAG     |
| AP1B1_7.2_FW         | CCTGATTGGGGGCACCAAC     |
| AP1B1_7_REV          | AGGGAGATCTCCACTGTCTG    |
| AP1B1_8_FW           | CCCCAAAGCAGTCTGGCTCC    |
| AP1B1_8_REV          | GATGTTGCTGCTCTGCAGCT    |
| AP1B1_9_FW           | ACGGGAAGATGGACCGGCA     |
| AP1B1_9.1_REV        | CTAAGTCCGTGCAGCTGGG     |
| AP1B1_9.2_REV        | TCAGGGACAGCGTGCAGCT     |
| AP1B1_10.1_FW        | CCCAGCTGCACGGACTTAG     |
| AP1B1_10.2_FW        | AGCTGCACGCTGTCCCTGA     |
| AP1B1_10_REV         | TAACCCACATCACAGCCAC     |
