# Supplementary material for: Characterization of 22q12 Microdeletions Causing Position Effect in Rare NF2 Patients with Complex Phenotypes
Source: MDPI journal article supplement (doi:10.3390/ijms231710017), 2022-09-02
Supplement: s1 [file s1]

**Table S2. Statistical analysis of real-time PCR data**

| Gene           | Samples | 2 <sup>^</sup> (-ΔCt) mean ± SD | BH-adjusted p >  t |                    |
|----------------|---------|---------------------------------|--------------------|--------------------|
|                |         |                                 | PT <i>vs</i> WT    | PT <i>vs</i> NF2im |
| <i>AP1B1</i>   | WT      | 0.214 ± 0.024                   |                    |                    |
|                | NF2im   | 0.218 ± 0.110                   |                    |                    |
|                | PT 246  | 0.131 ± 0.072                   | 0.034              | 0.570              |
| <i>MTMR3</i>   | WT      | 1.076 ± 0.211                   |                    |                    |
|                | NF2im   | 1.074 ± 0.563                   |                    |                    |
|                | PT 246  | 2.190 ± 1.052                   | 0.036              | 0.464              |
|                | PT 366  | 1.136 ± 0.698                   | 0.974              | 0.965              |
| <i>LIMK2</i>   | WT      | 0.454 ± 0.241                   |                    |                    |
|                | NF2im   | 0.303 ± 0.022                   |                    |                    |
|                | PT 246  | 0.789 ± 0.139                   | 0.137              | 0.024              |
|                | PT 366  | 0.393 ± 0.125                   | 0.954              | 0.568              |
|                | PT 160  | 0.504 ± 0.014                   | 0.942              | 0.003              |
| <i>PIK3IP1</i> | WT      | 0.295 ± 0.127                   |                    |                    |
|                | NF2im   | 0.268 ± 0.028                   |                    |                    |
|                | PT 246  | 0.235 ± 0.074                   | 0.746              | 0.762              |
|                | PT 366  | 0.287 ± 0.152                   | 0.930              | 0.942              |
|                | PT 160  | 0.399 ± 0.021                   | 0.444              | 0.026              |

NF2im, patients with *NF2* intragenic mutation; BH-adjusted p, p-value corrected by Benjamini-Hochberg method; PT, patient; SD, standard deviation; t, t-value; WT, wild type controls
