# Supplementary material for: Characterization of 22q12 Microdeletions Causing Position Effect in Rare NF2 Patients with Complex Phenotypes
Source: MDPI journal article supplement (doi:10.3390/ijms231710017), 2022-09-02
Supplement: s1 [file s1]

**Table S3. Regulatory elements mapping in 22q12 region**

| <b>Category</b> | <b>ID</b> | <b>Genomic coordinates</b>  | <b>PT 246 deletion</b> | <b>PT 366 deletion</b> | <b>PT 160 deletion</b> |
|-----------------|-----------|-----------------------------|------------------------|------------------------|------------------------|
| Enhancer        | hs1645    | chr22:28,746,697-28,748,395 | out                    | out                    | out                    |
| Enhancer        | hs2240    | chr22:32,019,365-32,023,822 | out                    | out                    | out                    |
| Insulator       | EMBL_M1   | chr22:30,682,932-30,682,945 | out                    | out                    | in                     |
| Insulator       | EMBL_M1   | chr22:30,783,441-30,783,454 | out                    | out                    | in                     |
| Insulator       | EMBL_M2   | chr22:28,359,682-28,359,690 | out                    | out                    | out                    |
| Insulator       | EMBL_M2   | chr22:28,469,178-28,469,186 | out                    | out                    | out                    |
| Insulator       | EMBL_M2   | chr22:28,543,844-28,543,852 | out                    | out                    | out                    |
| Insulator       | EMBL_M2   | chr22:28,698,163-28,698,171 | out                    | out                    | out                    |
| Insulator       | EMBL_M2   | chr22:28,758,324-28,758,332 | out                    | out                    | out                    |
| Insulator       | EMBL_M2   | chr22:28,760,291-28,760,299 | out                    | out                    | out                    |
| Insulator       | EMBL_M2   | chr22:28,847,448-28,847,456 | out                    | out                    | out                    |
| Insulator       | EMBL_M2   | chr22:28,864,987-28,864,995 | out                    | out                    | out                    |
| Insulator       | EMBL_M2   | chr22:29,041,938-29,041,946 | out                    | out                    | out                    |
| Insulator       | EMBL_M2   | chr22:29,090,446-29,090,454 | out                    | out                    | out                    |
| Insulator       | EMBL_M2   | chr22:29,210,918-29,210,926 | out                    | out                    | out                    |
| Insulator       | EMBL_M2   | chr22:29,298,811-29,298,819 | out                    | out                    | in                     |
| Insulator       | EMBL_M2   | chr22:29,788,637-29,788,645 | out                    | in                     | in                     |
| Insulator       | EMBL_M2   | chr22:30,083,878-30,083,886 | out                    | in                     | in                     |
| Insulator       | EMBL_M2   | chr22:30,093,309-30,093,317 | out                    | in                     | in                     |
| Insulator       | EMBL_M2   | chr22:30,206,272-30,206,280 | out                    | out                    | in                     |
| Insulator       | EMBL_M2   | chr22:30,334,088-30,334,096 | out                    | out                    | in                     |
| Insulator       | EMBL_M2   | chr22:30,697,806-30,697,814 | out                    | out                    | in                     |
| Insulator       | EMBL_M2   | chr22:30,766,430-30,766,438 | out                    | out                    | in                     |
| Insulator       | EMBL_M2   | chr22:30,833,966-30,833,974 | out                    | out                    | in                     |
| Insulator       | EMBL_M2   | chr22:30,928,154-30,928,162 | out                    | out                    | in                     |
| Insulator       | EMBL_M2   | chr22:30,986,847-30,986,855 | out                    | out                    | in                     |
| Insulator       | EMBL_M2   | chr22:31,041,156-31,041,164 | out                    | out                    | in                     |
| Insulator       | EMBL_M2   | chr22:31,047,945-31,047,953 | out                    | out                    | in                     |
| Insulator       | EMBL_M2   | chr22:31,336,929-31,336,937 | out                    | out                    | out                    |
| Insulator       | EMBL_M2   | chr22:31,401,652-31,401,660 | out                    | out                    | out                    |
| Insulator       | EMBL_M2   | chr22:31,483,953-31,483,961 | out                    | out                    | out                    |
| Insulator       | EMBL_M2   | chr22:31,548,528-31,548,536 | out                    | out                    | out                    |
| Insulator       | EMBL_M2   | chr22:31,663,502-31,663,510 | out                    | out                    | out                    |
| Insulator       | REN_20    | chr22:30,783,438-30,783,457 | out                    | out                    | in                     |
| Insulator       | MIT_LM2   | chr22:30,881,492-30,881,510 | out                    | out                    | in                     |
| Insulator       | MIT_LM7   | chr22:29,808,882-29,808,901 | out                    | in                     | in                     |
| Insulator       | MIT_LM23  | chr22:31,478,757-31,478,776 | out                    | out                    | out                    |
