# Supplementary material for: Characterization of 22q12 Microdeletions Causing Position Effect in Rare NF2 Patients with Complex Phenotypes
Source: MDPI journal article supplement (doi:10.3390/ijms231710017), 2022-09-02
Supplement: s1 [file s1]

**Table S1. Deletion gene content**

| <b>Patient</b>      | <b>246</b>                  | <b>366</b>                                                                                           | <b>160</b>                                                                                                                                                                                                                                                                                                 |
|---------------------|-----------------------------|------------------------------------------------------------------------------------------------------|------------------------------------------------------------------------------------------------------------------------------------------------------------------------------------------------------------------------------------------------------------------------------------------------------------|
| <b>Proximal BP</b>  | chr22:29,928,889-29,928,896 | chr22:29,594,735-29,594,767                                                                          | chr22:29,277,234-29,277,248                                                                                                                                                                                                                                                                                |
| <b>Distal BP</b>    | chr22:30,075,777-30,075,784 | chr22:30,155,876-30,155,908                                                                          | chr22:31,143,939-31,143,953                                                                                                                                                                                                                                                                                |
| <b>Gene content</b> | <i>THOC5, NIPSNAP1, NF2</i> | <i>EMID1, RHBDD3, EWSR1, GAS2L1, RASL10A, AP1B1, RFPL1, NEFH, THOC5, NIPSNAP1, NF2, CABP7, ZMAT5</i> | <i>ZNRF3, C22orf31, KREMEN1, EMID1, RHBDD3, EWSR1, GAS2L1, RASL10A, AP1B1, RFPL1, NEFH, THOC5, NIPSNAP1, NF2, CABP7, ZMAT5, UQCR10, ASCC2, MTMR3, HORMAD2, LIF, OSM, CASTOR1, TBC1D10A, SF3A1, CCDC157, RNF215, SEC14L2, MTFP1, SEC14L3, SEC14L4, SEC14L6, GAL3ST1, PES1, TCN2, SLC35E4, DUSP18, OSBP2</i> |
