# Supplementary material for: Characterization of 22q12 Microdeletions Causing Position Effect in Rare NF2 Patients with Complex Phenotypes
Source: MDPI journal article supplement (doi:10.3390/ijms231710017), 2022-09-02
Supplement: s1 [file s1]

**Table S5. Sequence of primers for Long-range PCR assays**

| <b>Repeated sequence</b> | <b>Oligonucleotide name</b> | <b>Sequence (5' to 3')</b> | <b>Paatient tested</b> |
|--------------------------|-----------------------------|----------------------------|------------------------|
| MLT1K                    | MLT1K F                     | CTGCAGCAAACCTATGATGAAG     | 246                    |
| MIRb                     | MIRb F                      | AGTCTGGGTGAAAGGGTAAG       | 246                    |
| L1ME3                    | THOC5 int 7 F               | TAACCCAAAAGAGGCCCATG       | 246                    |
|                          | THOC5 int 8 F               | TGACGGACACAGAGAACCC        | 246                    |
|                          | THOC5 int 8 (N) F           | CCTGTAATCCCAGCACTTTG       | 246                    |
|                          | THOC5 int 9 F               | ACAGTAGCTGCCCCATTAGT       | 246                    |
|                          | THOC5 int 9 (N) F           | TGGCTCATGTCTGGTTGGGA       | 246                    |
| MLT1A0                   | MLT1A0 a R                  | TGGTCTCAAAGGGCTGGGA        | 246                    |
|                          | MLT1A0 b R                  | TCTCCTTGCTCAACCCTTC        | 246                    |
|                          | MLT1A0 c R                  | ACCCCTCATCCCTTCCACT        | 246                    |
|                          | MLT1A0 c (N) R              | TAGACTCCACCTCTGCCCCG       | 246                    |
|                          | MLT1A0 c (N2) R             | TGAGACAGGGTGTCTCTCTG       | 246                    |
| L2a                      | L2a F                       | TGTGCCTGGCCTATGTTGAC       | 366                    |
| L1MC4                    | L1MC4a F                    | GGTCCCTCAGTTCACCTTTC       | 366                    |
|                          | L1MC4a (N1) F               | CCTAGTGTGGGTTTCTCTTAT      | 366                    |
|                          | L1MC4a (N2) F               | AGTAGTCTCACTCTGTCACTC      | 366                    |
| Tigger2b_Pri             | Tigger2b F                  | ACAATATGGGGATTAAGGCAC      | 366                    |
| MIRb                     | MIRb(1) F                   | GAGAGGAGCCACGATTAC         | 366                    |
| AluJb                    | AluJb(2) R                  | TGGATTCAGACCTGGGTG         | 366                    |
| MLT1F                    | MLT1F R                     | CACTGAGATGGAAGCAGCAG       | 366                    |
| AluSx                    | AluSx(2) R                  | CAGGGAGTTAAAGGTGTGGC       | 366                    |
| AluJb                    | AluJb(1) R                  | CGAGATCACCTAGTCCCAG        | 366                    |
| MIRb                     | MIRb R                      | AGTGCCAAGCAAGCGGGAA        | 366                    |
| AluSx                    | AluSx(1) R                  | TCCAGGAGTGTGACAAGACA       | 366                    |
|                          | AluSx(1) (N1) R             | AAGCGATTCTCCTGCCTCAG       | 366                    |
|                          | AluSx(1) (N2) R             | GAATCTCGCTCTGTTGCCC        | 366                    |
| L2b                      | L2b R                       | GCTCAACTCTTCGCCTTGTC       | 366                    |
| AluJb                    | AluJb F                     | TTGTTCCCAACCATGACTTA       | 160                    |
| MLT1K                    | MLT1K F                     | CAAGCCTTGAATGCCAGGAT       | 160                    |
| MER102c                  | MER102c F                   | TCCATCATCAGCCTTTCTTGG      | 160                    |
| MER2b                    | MER2b F                     | TTTCAGATGTAAGCCACCGC       | 160                    |
| L1MB7                    | L1MB7 F                     | GCAGGCCAAGGGAGGATAG        | 160                    |
|                          | L1MB7 (N) F                 | TTGAGGGTGTGAAATGTGCG       | 160                    |
|                          | L1MB7 (N2) F                | GGGCTCAGGAGTTTGATTCC       | 160                    |
|                          | L1MB7 (N3)F                 | AGAATATGTGGGCTTTTGGGT      | 160                    |
|                          | L1MB7 (N4) F                | TGGAGTCTCACTCTGTCTGC       | 160                    |
| AluSx                    | AluSx F                     | TCCAGGTTCTTGTCATGTTGT      | 160                    |
| MLT1C                    | MLT1C F                     | GCTGGGCTCTCTATCCTTC        | 160                    |
| L1ME34                   | L1ME34 R                    | ATAGGCACCCACCAATATGC       | 160                    |

|         |           |                       |     |
|---------|-----------|-----------------------|-----|
| AluJb   | AluJb R   | TCAACAGAGTGAGATGAGACT | 160 |
| AluSz   | AluSz R   | CTGCTCAAACCTTGGGAGAAG | 160 |
| LTR16D2 | LTR16D2 R | GAGGGTCTAGGGTGGGTAG   | 160 |
| L2b     | L2b R     | TGCTCCTTTTGCTTTCTGAGG | 160 |
|         | L2b (N) R | CGCAACACCACAGTCTTCTT  | 160 |
