# Supplementary material for: Characterization of 22q12 Microdeletions Causing Position Effect in Rare NF2 Patients with Complex Phenotypes
Source: MDPI journal article supplement (doi:10.3390/ijms231710017), 2022-09-02
Supplement: s1 [file s1]

**Table S4. Sequence of primers for qPCR-gDNA assays**

| Region target                | Oligonucleotide name | Sequence (5' to 3')   |
|------------------------------|----------------------|-----------------------|
| chr22:25,767,231-25,767,386  | LRP5L_gDNA F         | AAGGCAAGAAGGAACAGCAC  |
|                              | LRP5L_gDNA R         | TCCAGAGAGCCCCTTACTC   |
| chr22:27,006,914- 27,007,085 | CRYBB1_gDNA F        | TGCCTGTTCTCTGTCTGTG   |
|                              | CRYBB1_gDNA R        | GGGAGACAAGAGCAAACGAG  |
| chr:28,190,925-28,191,140    | MN1_gDNA F           | CAGCATCAGCATTCTCCAGG  |
|                              | MN1_gDNA R           | TAGAAGTGACAGGGGCTGAG  |
| chr22:29,386,019-29,386,193  | ZNRF3_gDNA F         | CATTCTGTGGGAGGAGGTAC  |
|                              | ZNRF3_gDNA R         | GCCTCTCCACATTAAGTACAG |
| chr22:29,498,291-29,498,462  | KREMEN1_gDNA F       | GAGTGTGCCTTCATCCAGTC  |
|                              | KREMEN1_gDNA R       | AATGGACCGAGGAAAATCTGC |
| chr22:29,727,322-29,727,479  | AP1B1_gDNA F         | CGACTCCATTTACGGGCAAG  |
|                              | AP1B1_gDNA R         | TGTACCCACTGCACATCCTC  |
| chr22:29,840,970-29,841,120  | RFPL1_NEFH_gDNA F    | GCCCATACCCTTAGCTGTCA  |
|                              | RFPL1_NEFH_gDNA R    | CACCTTCTTCTGCACGACCA  |
| chr22:30,051,058-30,051,176  | NF2 intron 5_gDNA F  | AGAGGAGATGAGGTAGGGGT  |
|                              | NF2 intron 5_gDNA R  | GAGGGCTGTAAAATCGGCAG  |
| chr12:6,643,799-6,643,932    | GAPDH_gDNA F         | CAGGCCGGATGTGTTTCGC   |
|                              | GAPDH_gDNA R         | GACACACACGCCTCCCCT    |
