# Supplementary material for: Characterization of 22q12 Microdeletions Causing Position Effect in Rare NF2 Patients with Complex Phenotypes
Source: MDPI journal article supplement (doi:10.3390/ijms231710017), 2022-09-02
Supplement: s1 [file s1]

**Table S7. Sequence of primers for RT-qPCR assays**

| Gene target    | Oligonucleotide name | Sequence (5' to 3')   |
|----------------|----------------------|-----------------------|
| <i>HSCB</i>    | HSCB_qPCR F          | GCGTCTTGTCCACCCAGATT  |
|                | HSCB_qPCR R          | GGAGCTTTAGAAGGTACAGTC |
| <i>CCDC117</i> | CCDC117_qPCR F       | AGAAACACAAGCGAGAGGAG  |
|                | CCDC117_qPCR R       | TTACTCCATGCCCCTCTACA  |
| <i>XBP1</i>    | XBP1_qPCR F          | GCCAAGGGGAATGAAGTGAG  |
|                | XBP1_qPCR R          | ATGGGGAGATGTTCTGGAGG  |
| <i>AP1B1</i>   | AP1B1_qPCR F         | CCTGGTCACACTGCTGTCA   |
|                | AP1B1_qPCR R         | TCAGGCCTTTTCTGCACGAT  |
| <i>ZMAT5</i>   | ZMT5_qPCR F          | ACAACCTCCACAACCGCAAG  |
|                | ZMT5_qPCR R          | CTGCATCTCGGAACATGTCCG |
| <i>UQCR10</i>  | UQCR10_qPCR F        | TTGTACTCCCTGCTGTTCCG  |
|                | UQCR10_qPCR R        | CTTCCCCTCGTTGATGTGGT  |
| <i>ASCC2</i>   | ASCC2_qPCR F         | ACCCGAAGACAGGAAAGCTG  |
|                | ASCC2_qPCR R         | CACTAGGGCGGGAATGTTGT  |
| <i>MTMR3</i>   | MTMR3_qPCR F         | GTGGCTTGACTGTGTTTCATC |
|                | MTMR3_qPCR R         | TGCTTTTCCCCTCTCTCCTT  |
| <i>RNF185</i>  | RNF185_qPCR F        | GCAGGACAGCACTTTCGAG   |
|                | RNF185_qPCR R        | ACCACTGATGTAAACACGGC  |
| <i>LIMK2</i>   | LIMK2_qPCR F         | CTCTTGCTTCCGGTGTTTCAG |
|                | LIMK2_qPCR R         | GCAGTAGAGCTTCCCATCC   |
| <i>PIK3IP1</i> | PIK3IP1_qPCR F       | GGGTACAAGCATTCTCGTC   |
|                | PIK3IP1_qPCR R       | GTTGTCCCAGAAACAGCCTC  |
| <i>PATZ1</i>   | PATZ1_qPCR F         | GCCTGATCACTTGAACGGAC  |
|                | PATZ1_qPCR R         | GTCTCGGGTGGCAAAAGAAG  |
| <i>EIF4A2</i>  | EIF4A2_qPCR F        | GGTCAGGGTCAAGTCGTGTT  |
|                | EIF4A2_qPCR R        | CCCCCTCTGCCAATTCTGTG  |
